# Supplementary material
Source: PubMed Central journal article supplement (PMC8696694)
Supplement: jamacardiol-e215340-s001.pdf [file jamacardiol-e215340-s001.pdf]

## Supplementary Online Content

Zhang L, Olalere D, Mayrhofer T, et al. Differences in cardiovascular risk, coronary artery disease, and cardiac events between Black and White individuals enrolled in the PROMISE Trial. *JAMA Cardiol*. Published online December 22, 2021.  
doi:10.1001/jamacardio.2021.5340

**eTable.** Race and Ethnicity in the Overall PROMISE Trial Compared With the 2018 US Census

This supplementary material has been provided by the authors to give readers additional information about their work.

**eTable:** Race and ethnicity in the overall PROMISE trial compared with the 2018 US Census

|                                           | <b>PROMISE<br/>N = 10,003</b> | <b>2018 US Census<br/>(≥45 years old)*<br/>N = 138 million</b> |
|-------------------------------------------|-------------------------------|----------------------------------------------------------------|
| Race                                      |                               |                                                                |
| White individuals                         | 84.4% (8,371/9,916)           | 80.9%                                                          |
| Black or African American individuals     | 11.1% (1,096/9,916)           | 11.6%                                                          |
| Asian individuals                         | 2.6% (253/9,916)              | 5.6%                                                           |
| American Indian/Alaska Native             | 0.7% (71/9,916)               | 1.6%                                                           |
| Native Hawaiian or other Pacific Islander | 0.3% (30/9,916)               | 0.3%                                                           |
| Other                                     | 1.0% (95/9,916)               |                                                                |
| Ethnicity                                 |                               |                                                                |
| Hispanic                                  | 7.7% (767/9,945)              | 12.1%                                                          |
| Non-Hispanic (NH)                         | 92.3% (9,178/9,945)           | 87.9%                                                          |
| Non-Hispanic Black or White individuals   |                               |                                                                |
| NH Black individuals                      | 12.2% (1,071/8,764)           | 13.6%                                                          |
| NH White individuals                      | 87.8% (7,693/8,764)           | 86.4%                                                          |

\* PROMISE enrollment was from July 27, 2010 to September 19, 2013.  
Comparison is made to the most recent US Census data from July 1, 2018.

**2018 US Census data from**

[https://factfinder.census.gov/faces/tableservices/jsf/pages/productview.xhtml?pid=PEP\\_2018\\_PEPALL5N&prodType=table](https://factfinder.census.gov/faces/tableservices/jsf/pages/productview.xhtml?pid=PEP_2018_PEPALL5N&prodType=table)
